# Supplementary material for: Microplastics in the Ecosystem: A Systematic Review of the Methods for Their Detection and Removal
Source: Hindawi journal article supplement (doi:10.1155/2023/8826716), 2023-12-31
Supplement: f1 [file 8826716.f1.zip]

Archive with 3 entries (3 files):
- Tabla S1.pdf
- Table S2.pdf
- Table S3.pdf
