# Supplementary material for: Microplastics in the Ecosystem: A Systematic Review of the Methods for Their Detection and Removal
Source: Hindawi journal article supplement (doi:10.1155/2023/8826716), 2023-12-31
Supplement: f1 [file 8826716.f1.zip › Tabla S1.pdf]

| GENERALITIES |                                                                                                                                                                                                                                                                                    |                                                                                                                                                       |      |                                                         |     |        |             |                                 |
|--------------|------------------------------------------------------------------------------------------------------------------------------------------------------------------------------------------------------------------------------------------------------------------------------------|-------------------------------------------------------------------------------------------------------------------------------------------------------|------|---------------------------------------------------------|-----|--------|-------------|---------------------------------|
| S.No.        | Author                                                                                                                                                                                                                                                                             | Title                                                                                                                                                 | Year | Journal                                                 | Vol | Number | Article No. | DOI                             |
| 1            | Marthino S., Cruz V., Figueiredo S., Delerue C.                                                                                                                                                                                                                                    | Microplastic Pollution Focused on Sources, Distribution, Contaminant Interactions, Analytical Methods, and Wastewater Removal Strategies: A Review    | 2022 | International Journal of Environmental                  | 19  | 9      | 5610        | 10.3390/ijerph19095610          |
| 2            | Gan Q., Tian J., Li Z., Mi S., Wang W.                                                                                                                                                                                                                                             | Hazards and Improvement Measures of Microplastic Pollution : A Review                                                                                 | 2021 | E3S Web of Conferences                                  | 257 |        |             | 10.1051/e3sconf/202125703006    |
| 3            | Herrera N., Olortiga Y.                                                                                                                                                                                                                                                            | Microplastics: characteristics, pollution, and technologies for their removal from water- a review                                                    | 2021 | Brazilian Journal of Development                        | 7   | 8      |             | 10.34117/bjdv7n8-168            |
| 4            | Vianello A., Lund R., Liu L., Vollertsen J.                                                                                                                                                                                                                                        | Simulating human exposure to indoor airborne microplastics using a Breathing Thermal Manikin                                                          | 2019 | Scientific Reports                                      | 9   |        | 8670        | 10.1038/s41598-019-45054-w      |
| 5            | Waldschlager K., Brückner M., Carney Almroth B., Hackney C., Mehedi T., Alimi O., Lynn S., Cowger W., Doyle D., Gray A., Kane I., Kooi M., Kramer M., Lechthaler S., Michie L., Nordam T., Pohl F., Russell C., Thit A., Umar W., Valero D, Varrani A, Kumar A., Woodall L., Wu N. | Learning from natural sediments to tackle microplastics challenges: A multidisciplinary perspective                                                   | 2022 | Earth-Science Reviews                                   | 228 |        | 140121      | 10.1016/j.earscirev.2022.104021 |
| 6            | Akdogan Z., Guven B.                                                                                                                                                                                                                                                               | Microplastics in the environment: A critical review of current understanding and identification of future research needs                              | 2019 | Environmental Pollution                                 | 254 |        | 113011      | 10.1016/j.envpol.2019.113011    |
| 7            | Hasan A., Hossain S., Alam M., Binte M., Hasnine T., Rahman M.                                                                                                                                                                                                                     | Microplastics pollution: A comprehensive review on the sources, fates, effects, and potential remediation                                             | 2021 | Environmental Nanotechnology, Monitoring and Assessment | 16  |        | 100530      | 10.1016/j.enmm.2021.100530      |
| 8            | Park H., Park B.                                                                                                                                                                                                                                                                   | Review of Microplastic Distribution, Toxicity, Analysis Methods, and Removal Technologies                                                             | 2021 | Water                                                   | 13  |        | 2736        | 10.3390/w13192736               |
| 9            | Zhang Q., Genbo E., Li J., Chen Q., Ma L., Zeng E., Shi H.                                                                                                                                                                                                                         | A Review of Microplastics in Table Salt, Drinking Water, and Air: Direct Human Exposure                                                               | 2020 | Environmental Science & Technology                      | 54  |        |             | 10.1021/acs.est.9b04535         |
| 10           | Huerta E., Beriot N., Corradini F., Silva V., Yang X., Baartman J., Rezaei M., Schaik L., Rickson M., Geissen V.                                                                                                                                                                   | Review of microplastic sources, transport pathways and correlations with other soil stressors: a journey from agricultural sites into the environment | 2022 | Chemical and Biological Technologies                    | 9   | 20     |             | 10.1186/s40538-021-00278-9      |
| 11           | Shahul F., Sanam M., Anuar N., Anuar N., Mohan P., Periathamby A.                                                                                                                                                                                                                  | Worldwide distribution and abundance of microplastic: How dire is the situation?                                                                      | 2018 | Waste Management & Research                             | 36  | 10     | 785730      | 10.1177/0734242X18785730        |
| 12           | Wang J., Zheng L., Li J.                                                                                                                                                                                                                                                           | A critical review on the sources and instruments of marine microplastics and prospects on the relevant management in China                            | 2018 | Waste Management & Research                             | 36  | 10     | 793504      | 10.1177/0734242X18793504        |
| 13           | Wu C., Xiong X., Hossein A., Zhang Y., Xu X.                                                                                                                                                                                                                                       | A review on source, occurrence, and impacts of microplastics in freshwater aquaculture systems in China                                               | 2022 | Water Biology and Security                              | 1   |        | 100040      | 10.1016/j.watbs.2022.100040     |
| 14           | Danopoulos E., Twiddy M., Rotchell J.                                                                                                                                                                                                                                              | Microplastic contamination of drinking water: A systematic review                                                                                     | 2020 | Plos One                                                | 15  | 7      |             | 10.1371/journal.pone.0236838    |
| 15           | Ricciardi M., Pironti C., Motta O., Miele Y., Proto A., Montano L.                                                                                                                                                                                                                 | Microplastics in the Aquatic Environment: Occurrence, Persistence, Analysis, and Human Exposure                                                       | 2021 | Water                                                   | 13  |        | 973         | 10.3390/w13070973               |
| 16           | Li Y., Sun Y., Li J., Tang R., Miu Y., Ma X.                                                                                                                                                                                                                                       | Research on the Influence of Microplastics on Marine Life                                                                                             | 2021 | Earth and Environmental Science                         | 631 |        | 012006      | 10.1088/1755-1315/631/1/012006  |
| 17           | Kyriakopoulos G., Zamparas M., Kapsalis V.                                                                                                                                                                                                                                         | Investigating the Human Impacts and the Environmental Consequences of Microplastics Disposal into Water Resources                                     | 2022 | Sustainability                                          | 14  |        | 828         | 10.3390/su14020828              |
| 18           | Chota W., Chong J.                                                                                                                                                                                                                                                                 | First Record of Microplastic Ingestion by an Important Commercial Fish in the City of Iquitos, Peruvian Amazon                                        | 2020 | Folia Amazónica                                         | 29  | 2      |             | 10.24841/fa.v29i2.521           |
| 19           | Ita D., Vázquez I., Kahhat R.                                                                                                                                                                                                                                                      | Prevalence of microplastics in the ocean in Latin America and the Caribbean                                                                           | 2021 | Journal of Hazardous Materials Advances                 | 5   |        | 100037      | 10.1016/j.hazadv.2021.100037    |
| 20           | Caputi S., Diomedea F., Lanuti P., Marconi G., Di Carlo P., Sinjari B., Trubiani O.                                                                                                                                                                                                | Microplastics Affect the Inflammation Pathway in Human Gingival Fibroblasts: A Study in the Adriatic Sea                                              | 2022 | International Journal of Environmental                  | 19  |        | 137782      | 10.3390/ijerph19137782          |
| 21           | Delvalle D., Fábrega J., Olmos J., Garcés O., Silva S., Vezzoni M., de Sá J., M.                                                                                                                                                                                                   | Distribution of Plastic Debris in the Pacific and Caribbean Beaches of Panama                                                                         | 2020 | Air, Soil and Water Research                            | 13  |        |             | 10.1177/1178622120920268        |
| 22           | de Haan W., Uviedo O., Ballesteros M., Canales I., Curto X., Guart M., Higuera S., Molina A., Sanchez A.                                                                                                                                                                           | Floating microplastic loads in the nearshore revealed through citizen science                                                                         | 2022 | Environmental Research                                  | 17  |        | 045018      | 10.1088/1748-9326/ac5df1        |
| 23           | Gambino I., Bagordo F., Grassi T., Panico A., De Donno A.                                                                                                                                                                                                                          | Occurrence of Microplastics in Tap and Bottled Water: Current Knowledge                                                                               | 2022 | International Journal of Environmental                  | 19  |        | 5283        | 10.3390/ijerph19095283          |

|    |                                                                                                                                                                |                                                                                                                                  |      |                                               |     |     |         |                                 |
|----|----------------------------------------------------------------------------------------------------------------------------------------------------------------|----------------------------------------------------------------------------------------------------------------------------------|------|-----------------------------------------------|-----|-----|---------|---------------------------------|
| 24 | Yuan Z., Nag R., Cummins E.                                                                                                                                    | Human health concerns regarding microplastics in the aquatic environment - From marine to food systems                           | 2022 | Science of the Total Environment              | 823 |     | 153730  | 10.1016/j.scitotenv.2022.153730 |
| 25 | Okoffo E., Donner E., McGrath S., Tschärke B., O'Brien J., O'Brien S., Ribeiro F., D. Burrows S., Toapanta T., Rauert C., Samanipour S., Mueller J, Thomas K., | Plastics in biosolids from 1950 to 2016: A function of global plastic production and consumption                                 | 2021 | Water Research                                | 201 |     | 117367  | 10.1016/j.watres.2021.117367    |
| 26 | Conti I., Simioni C., Varano G., Brenna C., Costanzi E., Neri L.                                                                                               | Legislation to limit the environmental plastic and microplastic pollution and their influence on human exposure                  | 2021 | Environmental Pollution                       | 288 |     | 117708  | 10.1016/j.envpol.2021.117708    |
| 27 | Wicaksono E., Werorilangi S., Tahir A.                                                                                                                         | The influence of weirs on microplastic fate in the riverine environment (case study: Jeneberang River, Makassar City, Indonesia) | 2021 | Earth and Environmental Science               | 763 |     | 012054  | 10.1088/1755-1315/763/1/012054  |
| 28 | Ma J., Zhao J., Zhu Z., Li L., Yu F.                                                                                                                           | Effect of microplastic size on the adsorption behavior and mechanism of triclosan on polyvinyl chloride                          | 2019 | Environmental Pollution                       | 254 |     | 113104  | 10.1016/j.envpol.2019.113104    |
| 29 | Guzzetti E., Sueda A., Tejada S., Faggio C.                                                                                                                    | Microplastic in Marine Organism: Environmental and Toxicological Effects                                                         | 2018 | Environmental Toxicology and Pharmacology     | 64  |     |         | 10.1016/j.etap.2018.10.009      |
| 30 | De La Torre G.                                                                                                                                                 | Microplastics: an emerging threat to food security and human health                                                              | 2019 | Journal of Food Science and Technology        | 57  |     |         | 10.1007/s13197-019-04138-1      |
| 31 | Kutralam G., Pérez F., Elizalde I., Shruti V.                                                                                                                  | Branded milks – Are they immune from microplastics contamination?                                                                | 2020 | Science of the Total Environment              | 714 |     | 136823  | 10.1016/j.scitotenv.2020.136823 |
| 32 | Kosuth M., Mason S., Wattenberg E.                                                                                                                             | Anthropogenic contamination of tap water, beer, and sea salt                                                                     | 2018 | Plos One                                      | 13  | 4   | 0194970 | 10.1371/journal.pone.0194970    |
| 33 | Peixoto D., Pinheiro C., Amorim J., Oliva L., Guilhermino L., Natividade M.                                                                                    | Microplastic pollution in commercial salt for human consumption: A review                                                        | 2019 | Estuarine, Coastal and Shelf Science          | 219 |     |         | 10.1016/j.ecss.2019.02.018      |
| 34 | A. Kelly, D. Lannuzel, T. Rodemann, K. M. Meiners, and H. J. Auman                                                                                             | Microplastic contamination in east Antarctic sea ice                                                                             | 2020 | Marine Pollution Bulletin                     | 154 |     | 111130  | 10.1016/j.marpolbul.2020.111130 |
| 35 | Mason S., Welch V., Neratko J.                                                                                                                                 | Synthetic Polymer Contamination in Bottled Water                                                                                 | 2018 | Frontiers in Chemistry                        | 6   | 407 |         | 10.3389/fchem.2018.00407        |
| 36 | Shrivastava S., Shrivastava P.                                                                                                                                 | Strengthening of existing water treatment procedures to respond to the presence of microplastics in the drinking water           | 2020 | Short Communication                           | 9   | 1   |         | 10.4103/ijehe.ijehe_6_19        |
| 37 | Barceló D., Picó Y.                                                                                                                                            | Micro plastics in the Global Aquatic Environment: Analysis, Effects Remediation and Policy Solutions                             | 2019 | Journal of Environmental Chemical Engineering | 7   | 5   | 103421  | 10.1016/j.jece.2019.103421      |
| 38 | Weber F., Kerpen                                                                                                                                               | Investigation of microplastics contamination in drinking water of a German city                                                  | 2020 | Science of the Total Environment              | 755 |     | 143421  | 10.1016/j.scitotenv.2020.143421 |
| 39 | Arman N., Salmiati S., Aris A., Salim M., Nazifa T., Muhamad M., Marpogahtun M.                                                                                | A Review on Emerging Pollutants in the Water Environment: Existences, Health Effects and Treatment Processes                     | 2021 | Water                                         | 13  |     | 3258    | 10.3390/w13223258               |
| 40 | Gkika D., Mitropoulos A., Lambropoulou D., Kalavrouziotis I., Kyzas G.                                                                                         | Cosmetic wastewater treatment technologies: a review                                                                             | 2022 | Environmental Science and Pollution Research  | 29  |     |         | 10.1007/s11356-022-23045-1      |
| 41 | Su L., Xiong X., Zhang Y., Wu C., Xu X., Sung C., Shi H.                                                                                                       | Global transportation of plastics and microplastics: A critical review of pathways and influences                                | 2022 | Science of the Total Environment              | 831 |     | 154884  | 10.1016/j.scitotenv.2022.154884 |
| 42 | Pastorino P., Prearo M., Pizzul E., Elia A., Ginebreda A., Barceló D.                                                                                          | High-mountain lakes as indicators of microplastic pollution: current and future perspectives                                     | 2022 | Water Emerg Contam Nanoplastics               | 1   | 3   |         | 10.20517/wecn.2022.01           |
| 43 | Picó Y., Barceló D.                                                                                                                                            | Analysis and Prevention of Microplastics Pollution in Water: Current Perspectives and Future Directions                          | 2019 | American Chemistry Society Publications       | 4   | 4   |         | 10.1021/acsomega.9b00222        |
