# Supplementary material for: Microplastics in the Ecosystem: A Systematic Review of the Methods for Their Detection and Removal
Source: Hindawi journal article supplement (doi:10.1155/2023/8826716), 2023-12-31
Supplement: f1 [file 8826716.f1.zip › Table S2.pdf]

| DETECTION |                                                                                                           |                                                                                                                                                                        |      |                                                                              |     |        |             |                                 |
|-----------|-----------------------------------------------------------------------------------------------------------|------------------------------------------------------------------------------------------------------------------------------------------------------------------------|------|------------------------------------------------------------------------------|-----|--------|-------------|---------------------------------|
| S.No.     | Author                                                                                                    | Title                                                                                                                                                                  | Year | Journal                                                                      | Vol | Number | Article No. | DOI                             |
| 1         | De-la-Torrea G., Diones D., Castroa J., Antaya R., Yupanqui N., Espinoza D., Saldaña M.                   | Abundance and distribution of microplastics on sandy beaches of Lima, Peru                                                                                             | 2019 | Marine Pollution Bulletin                                                    | 151 |        | 110877      | 10.1016/j.marpolbul.2019.110877 |
| 2         | Fatahi M., Akdoga G., Dorfling C., Wyk V.                                                                 | Numerical Study of Microplastic Dispersal in Simulated Coastal Waters Using CFD Approach                                                                               | 2021 | Water                                                                        | 13  | 23     | 233432      | 10.3390/w13233432               |
| 3         | Leslie H., Van M., Brandsma S., Vethaak A., Garcia J., Lamoree M.                                         | Discovery and quantification of plastic particle pollution in human blood                                                                                              | 2022 | Environment International                                                    | 163 |        | 107199      | 10.1016/j.envint.2022.107199    |
| 4         | Leonard J., Ceylan H., Koutnik V., Tseng D., Ozcan A., Mohanty S.                                         | Smartphone-enabled rapid quantification of microplastics                                                                                                               | 2022 | Journal of Hazardous Materials Letters                                       | 3   |        | 100052      | 10.1016/j.hazl.2022.100052      |
| 5         | Shi B., Patel M., Yu D., Jihui Y., Li Z., Petriw D., Pruyn T., Smyth K., Passeport E., Miller D., Howe J. | Automatic quantification and classification of microplastics in scanning electron micrographs via deep learning                                                        | 2022 | Science of the Total Environment                                             | 825 |        | 153903      | 10.1016/j.scitotenv.2022.153903 |
| 6         | Li Q., Feng Z., Zhang T., Ma C., Shi H.                                                                   | Microplastics in the commercial seaweed nori                                                                                                                           | 2020 | Journal of Hazardous Materials                                               | 388 |        | 122060      | 10.1016/j.jhazmat.2020.122060   |
| 7         | Zhu Y., Lo H., Yeung C., Lam E.                                                                           | Microplastic pollution assessment with digital holography and zero-shot learning                                                                                       | 2022 | APL Photonics                                                                | 7   |        | 076102      | 10.1063/5.0093439               |
| 8         | Zhou F., Wang X., Wang G., Zuo Y.                                                                         | A Rapid Method for Detecting Microplastics Based on Fluorescence Lifetime Imaging Technology (FLIM)                                                                    | 2022 | Toxics                                                                       | 10  | 3      | 030118      | 10.3390/toxics10030118          |
| 9         | Dimaano R., Albo A., Adion A., Brucal J.                                                                  | ANTIPARA (Analysis of Tiny Particles in Aquatic Environment): A Water Scanning Device for Microplastics                                                                | 2020 | International Journal of Advanced Trends in Computer Science and Engineering | 9   | 4      | 942020      | 10.30534/ijatcse/2020/150942020 |
| 10        | Paredes M., Castillo T., Viteri R., Fuentes G., Boderio E.                                                | Microplastics in the drinking water of the Riobamba city, Ecuador                                                                                                      | 2019 | Engineering and Environmental Sciences                                       | 28  | 4      |             | 10.22630/PNIKS.2019.28.4.59     |
| 11        | Mallow O., Spacek S., Schwarzböck T., Fellner J., Rechberger H.                                           | A new thermoanalytical method for the quantification of microplastics in industrial wastewater                                                                         | 2019 | Environmental Pollution                                                      | 259 |        | 113862      | 10.1016/j.envpol.2019.113862    |
| 12        | Hernández J., Cano H., Guerra Y., Puello E., Ríos J., Vivas R., Oviedo J.                                 | Identification and Quantification of Microplastics in Effluents of Wastewater Treatment Plant by Differential Scanning Calorimetry (DSC)                               | 2022 | Sustainability                                                               | 14  |        | 4920        | 10.3390/su14094920              |
| 13        | Li P., Li Q., Hao Z., Yu S., Liu J.                                                                       | Analytical methods and environmental processes of nanoplastics                                                                                                         | 2020 | Journal of Environmental Sciences                                            | 94  |        |             | 10.1016/j.jes.2020.03.057       |
| 14        | Frigione M., Marini G., Pinna M.                                                                          | A Thermal Analysis-Based Approach to Identify Different Waste Macroplastics in Beach Litter: The Case Study of Aquatina di Frigole NATURA 2000 Site (IT9150003, Italy) | 2021 | Sustainability                                                               | 13  |        | 3186        | 10.3390/su13063186              |
| 15        | Huan Z., Hu B., Wang H.                                                                                   | Analytical methods for microplastics in the environment: a review                                                                                                      | 2022 | Environmental Chemistry Letters                                              | 21  |        |             | 10.1007/s10311-022-01525-7      |
| 16        | Woo H., Seo K., Choi Y., Kim J., Tanaka M., Lee K., Choi J.                                               | Methods of Analyzing Microsized Plastics in the Environment                                                                                                            | 2021 | Applied Sciences                                                             | 11  |        | 10640       | 10.3390/app112210640            |
| 17        | Martic S., Tabobondung M., Gao S., Lewis T.                                                               | Emerging electrochemical tools for microplastics remediation and sensing                                                                                               | 2022 | Frontiers in Sensors                                                         | 3   |        | 958633      | 10.3389/fsens.2022.958633       |
| 18        | Bitter H., Lackner S.                                                                                     | Fast and easy quantification of semi-crystalline microplastics in exemplary environmental matrices by differential scanning calorimetry (DSC)                          | 2021 | Chemical Engineering Journal                                                 | 423 |        | 129941      | 10.1016/j.cej.2021.129941       |
| 19        | H. A. Nel, A.J. Chetwynd.                                                                                 | An Untargeted Thermogravimetric Analysis-Fourier Transform Infrared-Gas Chromatography-Mass Spectrometry Approach for Plastic Polymer Identification                   | 2021 | Environmental Science & Technology                                           | 55  | 13     | 8721        | 10.1021/acs.est.1c01085         |
| 20        | Zainuddin Z., Syuhada                                                                                     | Study of Analysis Method on Microplastic Identification in Bottled Drinking Water                                                                                      | 2020 | Macromolecular Symposia                                                      | 391 |        | 1900195     | 10.1002/masy.201900195          |
| 21        | Rodríguez M., Sierra I., Pérez A., Fornaro L.                                                             | Identification and quantitation of semi-crystalline microplastics using image analysis and differential scanning calorimetry                                           | 2018 | Environmental Science and Pollution Research                                 | 25  |        |             | 10.1007/s11356-018-1846-0       |
| 22        | E. Hendrickson, E. C. Minor, and K. Schreiner                                                             | Microplastic Abundance and Composition in Western Lake Superior As Determined via Microscopy, Py-GC/MS, and FTIR                                                       | 2018 | Environmental Science & Technology                                           | 52  | 4      | 1787        | 10.1021/acs.est.7b05829.        |

|    |                                                                                                                                                                     |                                                                                                                                                  |      |                                                          |     |    |        |                                      |
|----|---------------------------------------------------------------------------------------------------------------------------------------------------------------------|--------------------------------------------------------------------------------------------------------------------------------------------------|------|----------------------------------------------------------|-----|----|--------|--------------------------------------|
| 23 | C. A. Peters, E. Hendrickson, E. C. Minor, K. Schreiner, J. Halbur, and S. P. Bratton                                                                               | Pyr-GC/MS analysis of microplastics extracted from the stomach content of benthivore fish from the Texas Gulf Coast                              | 2018 | Marine Pollution Bulletin                                | 137 |    |        | 10.1016/j.marpolbul.2018.09.049      |
| 24 | Müsellim E., Hussain M., Sajjad M., Ceylan S.                                                                                                                       | Thermokinetic and TG/DSC-FTIR study of pea waste biomass pyrolysis                                                                               | 2018 | Applied Thermal Engineering                              | 137 |    |        | 10.1016/j.applthermaleng.2018.03.050 |
| 25 | Hamdy S., Ghobashy M., Saad R.                                                                                                                                      | Identification of marine microplastics in Eastern Harbor, Mediterranean Coast of Egypt, using differential scanning calorimetry                  | 2019 | Marine Pollution Bulletin                                | 142 |    |        | 10.1016/j.marpolbul.2019.03.062      |
| 26 | Nguyen B., Claveau D., Hernandez L., Xu E., Farner J., Tufenkji N.                                                                                                  | Separation and Analysis of Microplastics and Nanoplastics in Complex Environmental Samples                                                       | 2019 | American Chemical Society                                | 52  | 4  |        | 10.1021/acs.accounts.8b00602         |
| 27 | Xu G., Cheng H., Jones R., Feng Y., Gong K., Li K., Fang X., Tahir M., Valev K., Zhang L.                                                                           | Surface-Enhanced Raman Spectroscopy Facilitates the Detection of Microplastics <1 µm in the Environment                                          | 2020 | Environmental Science & Technology                       | 54  | 24 |        | 10.1021/acs.est.0c02317              |
| 28 | Veerasingam S., Ranjani M., Venkatachalapathy R., Bagaev A., Mukhanov V., Litvinyuk D., Mugilarasan M., Gurumoorthi K., Gunganathan L., Aboobacker V., Vethamony P. | Contributions of Fourier transform infrared spectroscopy in microplastic pollution research: A review                                            | 2020 | Critical Reviews in Environmental Science and Technology | 51  | 22 |        | 10.1080/10643389.2020.1807450        |
| 29 | Zhang M., Li J., Ding H., Ding J., Jiang F., Ding N., Sun C.                                                                                                        | Distribution Characteristics and Influencing Factors of Microplastics in Urban Tap Water and Water Sources in Qingdao, China                     | 2019 | Analytical Letters                                       | 53  | 8  |        | 10.1080/00032719.2019.1705476        |
| 30 | Y. Chen, D. Wen, J. Pei, Y. Fei, D. Ouyang, H. Zhang and Y. Luo                                                                                                     | Identification and quantification of microplastics using Fourier transform infrared spectroscopy: Current status and future prospects            | 2020 | Environmental Science & Health                           | 18  |    |        | 10.1016/j.coesh.2020.05.004          |
| 31 | C. Campanale, I. Savino, C. Massarelli, and V. F. Uricchio                                                                                                          | Fourier Transform Infrared Spectroscopy to Assess the Degree of Alteration of Artificially Aged and Environmentally Weathered Microplastics      | 2023 | Polymers                                                 | 15  | 4  |        | 10.3390/polym15040911                |
| 32 | Gela S., Aragaw T.                                                                                                                                                  | Abundance and Characterization of Microplastics in Main Urban Ditches Across the Bahir Dar City, Ethiopia                                        | 2022 | Frontiers in Environmental Science                       | 10  |    | 831417 | 10.3389/fenvs.2022.831417            |
| 33 | Papadimitriou M., Allison G.                                                                                                                                        | Microplastics in the Mediterranean marine environment: a combined bibliometric and systematic analysis to identify current trends and challenges | 2022 | Microplastics and Nanoplastics                           | 2   | 8  |        | 10.1186/s43591-022-00026-2           |
| 34 | J. Fojt, I. Románeková, P. Procházková, J. David, M. Brtnický, and J. Kučerík                                                                                       | A Simple Method for Quantification of Polyhydroxybutyrate and Polylactic Acid Micro-Bioplastics in Soils by Evolved Gas Analysis                 | 2022 | Molecules                                                | 27  | 6  |        | 10.3390/molecules27061898            |
| 35 | González M., Hernández C., González J., López J., Hernández J.                                                                                                      | Monitoring of meso and microplastic debris in Playa Grande beach (Tenerife, Canary Islands, Spain) during a moon cycle                           | 2019 | Marine Pollution Bulletin                                | 150 |    | 110757 | 10.1016/j.marpolbul.2019.110757      |
