# Supplementary material for: Microplastics in the Ecosystem: A Systematic Review of the Methods for Their Detection and Removal
Source: Hindawi journal article supplement (doi:10.1155/2023/8826716), 2023-12-31
Supplement: f1 [file 8826716.f1.zip › Table S3.pdf]

| REMOVAL |                                                                                                          |                                                                                                                                  |      |                                                  |     |        |             |                                 |
|---------|----------------------------------------------------------------------------------------------------------|----------------------------------------------------------------------------------------------------------------------------------|------|--------------------------------------------------|-----|--------|-------------|---------------------------------|
| S.No.   | Author                                                                                                   | Title                                                                                                                            | Year | Journal                                          | Vol | Number | Article No. | DOI                             |
| 1       | E. E. Burns and A. B. A. Boxall                                                                          | Microplastics in the Aquatic Environment: Evidence for or Against Adverse Impacts and Major Knowledge Gaps                       | 2018 | Environmental Toxicology and Chemistry           | 37  | 11     | 2776        | 10.1002/etc.4268                |
| 2       | Singh S., Kalyanasundaram M., Diwan V.                                                                   | Removal of microplastics from wastewater: available techniques and way forward                                                   | 2022 | Water Science & Technology                       | 84  | 12     | 3689        | 10.2166/wst.2021.472            |
| 3       | Sun Y., Yuan J., Zhou T., Zhao Y., Yu F., Ma J.                                                          | Laboratory simulation of microplastics weathering and its adsorption behaviors in an aqueous environment: A systematic review    | 2020 | Environmental Pollution                          | 265 |        | 114864      | 10.1016/j.envpol.2020.114864    |
| 4       | Sun H., Moon J., Kim H., Lee J.Y.                                                                        | Modeling and Parametric Simulation of Microplastic Transport in Groundwater Environments                                         | 2021 | Applied Sciences                                 | 11  | 16     | 7189        | 10.3390/app11167189             |
| 5       | Beladi S., Hermanová S., Ying Y., Plutnar J., Pumera M.                                                  | A Maze in Plastic Wastes: Autonomous Motile Photocatalytic Microrobots against Microplastics                                     | 2021 | Applied Materials & Interfaces                   | 13  | 21     |             | 10.1021/acsami.1c04559          |
| 6       | Lian H., Ji Y., Ge W., Wu J., Song N., Yin Z., Chai C.                                                   | Release kinetics of microplastics from disposable face masks into the aqueous environment                                        | 2021 | Science of the Total Environment                 | 816 |        | 151650      | 10.1016/j.scitotenv.2021.151650 |
| 7       | Badola N., Bahuguna A., Sasson Y., Singh J.                                                              | Microplastics removal strategies: A step toward finding the solution                                                             | 2021 | Frontiers of Environmental Science & Engineering | 16  | 1      |             | 10.1007/s11783-021-1441-3       |
| 8       | Wang L., Kaeppler A., Fischer D., Simmchen J.                                                            | Photocatalytic TiO <sub>2</sub> Micromotors for Removal of Microplastics and Suspended Matter                                    | 2019 | Applied Materials & Interfaces                   | 11  | 36     |             | 10.1021/acsami.9b06128          |
| 9       | Xue J., Samaei S., Chen J., Doucet A., Tsun K.                                                           | What have we known so far about microplastics in drinking water treatment? A timely review                                       | 2022 | Frontiers of Environmental Science & Engineering | 16  | 5      |             | 10.1007/s11783-021-1492-5       |
| 10      | Espinoza J., Ordoñez J., Castañeda C., Benites E.                                                        | Environmental Biotechnology: Biodegradation of Microplastics with Larvae of Tenebrio Molitor and Galleria Mellonella             | 2022 | Chemical Engineering Transactions                | 93  |        | 293032      | 10.3303/CET2293032              |
| 11      | Cunha C, Silva L., Paulo J., Faria M., Nogueira N., Cordeiro N                                           | Microalgal-based biopolymer for nano- and microplastic removal: a possible biosolution for wastewater treatment                  | 2020 | Environmental Pollution                          | 263 |        | 114385      | 10.1016/j.envpol.2020.114385    |
| 12      | Sol D., Laca A., Laca A., Díaz M.                                                                        | Microplastics in Wastewater and Drinking Water Treatment Plants: Occurrence and Removal of Microfibres                           | 2021 | Applied Sciences                                 | 11  | 21     | 10109       | 10.3390/app112110109            |
| 13      | Pivokonsky, M., Cermakova, L., Novotna, K., Peer, P., Cajthaml, T., Janda, V.                            | Microplastics: new methods needed to filter tiny particles from drinking water                                                   | 2018 | Science of the Total Environment                 | 643 |        |             | 10.1016/j.scitotenv.2018.08.102 |
| 14      | Shen M., Zhang Y., Almatrafi E., Hu T., Zhou C., Song B., Zeng Z., Zeng G.                               | Efficient removal of microplastics from wastewater by an electrocoagulation process                                              | 2021 | Chemical Engineering Journal                     | 428 |        | 131161      | 10.1016/j.cej.2021.131161       |
| 15      | Kim K., Park S.                                                                                          | Enhancing Microplastics Removal from Wastewater Using Electro-Coagulation and Granule-Activated Carbon with Thermal Regeneration | 2021 | Processes                                        | 9   |        | 617         | 10.3390/pr9040617               |
| 16      | Krystynik P., Strunakova K., Syc M., Kluson P.                                                           | Notes on Common Misconceptions in Microplastics Removal from Water                                                               | 2021 | Applied Sciences                                 | 11  |        | 5833        | 10.3390/app11135833             |
| 17      | Perren W., Wojtasik A., Cai Q.                                                                           | Removal of Microbeads from Wastewater Using Electrocoagulation                                                                   | 2018 | American Chemical Society Omega                  | 3   |        |             | 10.1021/acsomega.7b02037        |
| 18      | Schrank I., Möller J., Imhof H., Hauenstein O., Zielke F., Agarwal S., Löder M., Greiner A., Laforsch C. | Microplastic sample purification methods - Assessing detrimental effects of purification procedures on specific plastic types    | 2022 | Science of the Total Environment                 | 833 |        | 154824      | 10.1016/j.scitotenv.2022.154824 |

|    |                                                                                                        |                                                                                                                                                  |      |                                              |     |      |        |                                 |
|----|--------------------------------------------------------------------------------------------------------|--------------------------------------------------------------------------------------------------------------------------------------------------|------|----------------------------------------------|-----|------|--------|---------------------------------|
| 19 | Park J., Lee S., Hwang D., Seo S.                                                                      | Recent Purification Technologies and Human Health Risk Assessment of Microplastics                                                               | 2020 | Materials                                    | 13  |      | 5196   | 10.3390/ma13225196              |
| 20 | T. U. Rahman et al.                                                                                    | The Advancement in Membrane Bioreactor (MBR) Technology toward Sustainable Industrial Wastewater Management                                      | 2023 | Membranes                                    | 13  | 2    |        | 10.3390/membranes13020181       |
| 21 | Zhang Z., Chen Y.                                                                                      | Effects of microplastics on wastewater and sewage sludge treatment and their removal: A review                                                   | 2019 | Chemical Engineering Journal                 | 382 |      | 122955 | 10.1016/j.cej.2019.122955       |
| 22 | Nizeyimara J., Lin S., Junaid K., Wu Y., Han D., Liu X.                                                | Waste tea residue adsorption coupled with electrocoagulation for improvement of copper and nickel ions removal from simulated wastewater         | 2022 | Scientific Reports                           | 12  | 3519 |        | 10.1038/s41598-022-07475-y      |
| 23 | T. K. Dey, E. Uddin, and M. Jamal                                                                      | Detection and removal of microplastics in wastewater: evolution and impact                                                                       | 2021 | Environmental Science and Pollution Research | 28  | 14   | 16925  | 10.1007/s11356-021-12943-5      |
| 24 | F. H. Saboor, S. Hadian-Ghazvini, and M. Torkashvand                                                   | Microplastics in Aquatic Environments: Recent Advances in Separation Techniques                                                                  | 2022 | Periodica Polytechnica Chemical Engineering  | 66  | 2    |        | 10.3311/PPCh.18930              |
| 25 | Masia P., Sol D., Ardura A., Laca A., Borrell Y., Dopico E., Laca A., Machado G., Diaz M., Garcia F.   | Bioremediation as a promising strategy for microplastics removal in wastewater treatment plants                                                  | 2020 | Marine Pollution Bulletin                    | 156 |      | 111252 | 10.1016/j.marpolbul.2020.111252 |
| 26 | Elkhatib D., Oyanedel V., Carissimi E.                                                                 | Electrocoagulation applied for the removal of microplastics from wastewater treatment facilities                                                 | 2021 | Separation and Purification Technology       | 276 |      | 118877 | 10.1016/j.seppur.2021.118877    |
| 27 | Sharma L., Prabhakar S., Tiwari V., Dhar A., Halder A.                                                 | Optimization of EC parameters using Fe and Al electrodes for hydrogen production and wastewater treatment                                        | 2020 | Environmental Advances                       | 3   |      | 100029 | 10.1016/j.envadv.2020.100029    |
| 28 | E. Wisniewska and K. Kowalczyk                                                                         | Recovery of Cellulose, Extracellular Polymeric Substances and Microplastics from Sewage Sludge: A Review                                         | 2022 | Energies                                     | 15  | 20   | 7744   | 10.3390/en15207744              |
| 29 | Padervand M., Lichtfouse E., Robert D., Wang C.                                                        | Removal of microplastics from the environment. A review                                                                                          | 2020 | Environmental Chemistry Letters              | 18  | 3    |        | 10.1007/s10311-020-00983-1      |
| 30 | Misra A., Zambrzycki C., Kloker G., Kotyrba A., Anjass M., Franco I., Mitchell S., Güttel R., Streh C. | Water Purification and Microplastics Removal Using Magnetic Polyoxometalate-Supported Ionic Liquid Phases (magPOM-SILPs)                         | 2020 | Communications                               | 59  |      |        | 10.1002/anie.201912111          |
| 31 | Hooriabad F., Hadian S., Torkashvand M.                                                                | Microplastics in Aquatic Environments: Recent Advances in Separation Techniques                                                                  | 2022 | Periodica Polytechnica Chemical Engineering  | 66  | 2    |        | 10.3311/PPCh.18930              |
| 32 | Yang L., Li K., Cui S., Kang Y., An L., Lei K.                                                         | Removal of microplastics in municipal sewage from China's largest water reclamation plant                                                        | 2019 | Water Research                               | 155 |      |        | 10.1016/j.watres.2019.02.046    |
| 33 | Grbic J., Nguyen B., Guo E., You J., Sinton D., Rochman C.                                             | Magnetic Extraction of Microplastics from Environmental Samples                                                                                  | 2019 | Environmental Science & Technology Letters   | 6   |      |        | 10.1021/acs.estlett.8b00671     |
| 34 | M. Elisabetta, E. Temporiti, L. Nicola, E. Nielsen, and S. Tosi                                        | Fungal Enzymes Involved in Plastics Biodegradation                                                                                               | 2022 | Microorganisms                               | 10  | 6    | 1180   | 10.3390/microorganisms10061180  |
| 35 | Lares M., Ncibi M., Sillanpää M., Sillanpää M.                                                         | Occurrence, identification and removal of microplastic particles and fibers in conventional activated sludge process and advanced MBR technology | 2018 | Water Research                               | 133 |      |        | 10.1016/j.watres.2018.01.049    |
| 36 | G. Cletus et al.                                                                                       | Fungal biodegradation of low-density polyethylene using consortium of Aspergillus species under controlled conditions                            | 2021 | Heliyon                                      | 7   |      |        | 10.1016/j.heliyon.2021.e07008   |
| 37 | Bayo J., López J., Olmos S.                                                                            | Membrane bioreactor and rapid sand filtration for the removal of microplastics in an urban wastewater treatment plant                            | 2020 | Marine Pollution Bulletin                    | 156 |      | 111211 | 10.1016/j.marpolbul.2020.111211 |

|    |                                                 |                                                                                                    |      |                                   |    |  |  |                           |
|----|-------------------------------------------------|----------------------------------------------------------------------------------------------------|------|-----------------------------------|----|--|--|---------------------------|
| 38 | Ma B., Xue W., Ding Y., Hu C.,<br>Liu H., Qu J. | Removal characteristics of microplastics by Fe-based<br>coagulants during drinking water treatment | 2018 | Journal of Environmental Sciences | 78 |  |  | 10.1016/j.jes.2018.10.006 |
|----|-------------------------------------------------|----------------------------------------------------------------------------------------------------|------|-----------------------------------|----|--|--|---------------------------|
